# Supplementary material
Source: Springer Nature journal article supplement (https://www.springermedizin.de/resource/supplementary/13012_2012_594_MOESM4_ESM.pdf/9630336)
Supplement: MOESM4 [file 9630336]

**Table S3: Content of instruments measuring teamwork context (enabling conditions; individual attitudes) <sup>1,2,3,4,5.</sup>**

|                                                                                  | primary care    |                   |                    |                |                   |                   |                         |                |                   |                   |                 |                   |                   |                      |                  |                 | other health care   |                   |                  |                            |                 |                        |                    |                  |                    |                    |                    |                 |                   |                |                      |                     | non health care    |               |                    |                    |                    |                |                   |                |                    |                    |                            |                        |                   |  |  |  |  |  |  |  |  |  |  |  |  |
|----------------------------------------------------------------------------------|-----------------|-------------------|--------------------|----------------|-------------------|-------------------|-------------------------|----------------|-------------------|-------------------|-----------------|-------------------|-------------------|----------------------|------------------|-----------------|---------------------|-------------------|------------------|----------------------------|-----------------|------------------------|--------------------|------------------|--------------------|--------------------|--------------------|-----------------|-------------------|----------------|----------------------|---------------------|--------------------|---------------|--------------------|--------------------|--------------------|----------------|-------------------|----------------|--------------------|--------------------|----------------------------|------------------------|-------------------|--|--|--|--|--|--|--|--|--|--|--|--|
|                                                                                  | Alemni 2001 [1] | Anderson 1998 [2] | Hearnshaw 1998 [3] | Lukas 2009 [4] | Shortell 1991 [5] | Shortell 2004 [6] | Adler-Milstein 2011 [7] | Baker 2010 [8] | Caldwell 2003 [9] | Campion 1993 [10] | Costa 2011 [11] | Dobson 2009a [12] | Duckers 2008 [13] | Edmondson 1999c [14] | Fulmer 2005 [15] | Gould 2002 [16] | Heinemann 1999 [17] | Irvine 2000a [18] | Irvine 2002 [19] | Lemieux-Charles 2002a [20] | Lewis 2003 [21] | Lichtenstein 1997 [22] | Lubomski 2008 [23] | Millis 2004 [24] | Millward 2001 [25] | Schouten 2010 [26] | Thyefors 2005 [27] | Allen 1998 [28] | Barczak 2010 [29] | Brav 2009 [30] | Bunderson 2010a [31] | Carlless 2000b [32] | Driskell 2010 [33] | Eby 1997 [34] | Kirkman 1999a [35] | Kirkman 1999b [35] | Langfred 2005 [36] | Manz 1987 [37] | Mathieu 2006 [38] | Shaw 2000 [39] | Staples 2008a [40] | Staples 2008c [40] | van den Bossche 2006a [41] | van der Vegt 1998 [42] | Wageman 2005 [43] |  |  |  |  |  |  |  |  |  |  |  |  |
| <b>ENABLING CONDITIONS</b>                                                       |                 |                   |                    |                |                   |                   |                         |                |                   |                   |                 |                   |                   |                      |                  |                 |                     |                   |                  |                            |                 |                        |                    |                  |                    |                    |                    |                 |                   |                |                      |                     |                    |               |                    |                    |                    |                |                   |                |                    |                    |                            |                        |                   |  |  |  |  |  |  |  |  |  |  |  |  |
| Task design                                                                      |                 |                   |                    |                |                   |                   |                         |                |                   |                   |                 |                   |                   |                      |                  |                 |                     |                   |                  |                            |                 |                        |                    |                  |                    |                    |                    |                 |                   |                |                      |                     |                    |               |                    |                    |                    |                |                   |                |                    |                    |                            |                        |                   |  |  |  |  |  |  |  |  |  |  |  |  |
| Interdependence (task, goal, outcome)                                            |                 |                   |                    |                |                   |                   |                         |                |                   |                   |                 |                   |                   |                      |                  |                 |                     |                   |                  |                            |                 |                        |                    |                  |                    |                    |                    |                 |                   |                |                      |                     |                    |               |                    |                    |                    |                |                   |                |                    |                    |                            |                        |                   |  |  |  |  |  |  |  |  |  |  |  |  |
| Autonomy (structural empowerment)                                                |                 |                   |                    |                |                   |                   |                         |                |                   |                   |                 |                   |                   |                      |                  |                 |                     |                   |                  |                            |                 |                        |                    |                  |                    |                    |                    |                 |                   |                |                      |                     |                    |               |                    |                    |                    |                |                   |                |                    |                    |                            |                        |                   |  |  |  |  |  |  |  |  |  |  |  |  |
| Significance or meaningfulness                                                   |                 |                   |                    |                |                   |                   |                         |                |                   |                   |                 |                   |                   |                      |                  |                 |                     |                   |                  |                            |                 |                        |                    |                  |                    |                    |                    |                 |                   |                |                      |                     |                    |               |                    |                    |                    |                |                   |                |                    |                    |                            |                        |                   |  |  |  |  |  |  |  |  |  |  |  |  |
| Complexity & achievability                                                       |                 |                   |                    |                |                   |                   |                         |                |                   |                   |                 |                   |                   |                      |                  |                 |                     |                   |                  |                            |                 |                        |                    |                  |                    |                    |                    |                 |                   |                |                      |                     |                    |               |                    |                    |                    |                |                   |                |                    |                    |                            |                        |                   |  |  |  |  |  |  |  |  |  |  |  |  |
| Team composition & structure                                                     |                 |                   |                    |                |                   |                   |                         |                |                   |                   |                 |                   |                   |                      |                  |                 |                     |                   |                  |                            |                 |                        |                    |                  |                    |                    |                    |                 |                   |                |                      |                     |                    |               |                    |                    |                    |                |                   |                |                    |                    |                            |                        |                   |  |  |  |  |  |  |  |  |  |  |  |  |
| Size (appropriateness of)                                                        |                 |                   |                    |                |                   |                   |                         |                |                   |                   |                 |                   |                   |                      |                  |                 |                     |                   |                  |                            |                 |                        |                    |                  |                    |                    |                    |                 |                   |                |                      |                     |                    |               |                    |                    |                    |                |                   |                |                    |                    |                            |                        |                   |  |  |  |  |  |  |  |  |  |  |  |  |
| Tenure, stability of membership, history working together                        |                 |                   |                    |                |                   |                   |                         |                |                   |                   |                 |                   |                   |                      |                  |                 |                     |                   |                  |                            |                 |                        |                    |                  |                    |                    |                    |                 |                   |                |                      |                     |                    |               |                    |                    |                    |                |                   |                |                    |                    |                            |                        |                   |  |  |  |  |  |  |  |  |  |  |  |  |
| Clear membership (bounded)                                                       |                 |                   |                    |                |                   |                   |                         |                |                   |                   |                 |                   |                   |                      |                  |                 |                     |                   |                  |                            |                 |                        |                    |                  |                    |                    |                    |                 |                   |                |                      |                     |                    |               |                    |                    |                    |                |                   |                |                    |                    |                            |                        |                   |  |  |  |  |  |  |  |  |  |  |  |  |
| Competencies of team members <sup>1</sup>                                        |                 |                   |                    |                |                   |                   |                         |                |                   |                   |                 |                   |                   |                      |                  |                 |                     |                   |                  |                            |                 |                        |                    |                  |                    |                    |                    |                 |                   |                |                      |                     |                    |               |                    |                    |                    |                |                   |                |                    |                    |                            |                        |                   |  |  |  |  |  |  |  |  |  |  |  |  |
| - knowledge, skills, expertise                                                   |                 |                   |                    |                |                   |                   |                         |                |                   |                   |                 |                   |                   |                      |                  |                 |                     |                   |                  |                            |                 |                        |                    |                  |                    |                    |                    |                 |                   |                |                      |                     |                    |               |                    |                    |                    |                |                   |                |                    |                    |                            |                        |                   |  |  |  |  |  |  |  |  |  |  |  |  |
| - influence (e.g., ability to access external support/resources)                 |                 |                   |                    |                |                   |                   |                         |                |                   |                   |                 |                   |                   |                      |                  |                 |                     |                   |                  |                            |                 |                        |                    |                  |                    |                    |                    |                 |                   |                |                      |                     |                    |               |                    |                    |                    |                |                   |                |                    |                    |                            |                        |                   |  |  |  |  |  |  |  |  |  |  |  |  |
| Diversity (knowledge, perspectives, profession, status etc)                      |                 |                   |                    |                |                   |                   |                         |                |                   |                   |                 |                   |                   |                      |                  |                 |                     |                   |                  |                            |                 |                        |                    |                  |                    |                    |                    |                 |                   |                |                      |                     |                    |               |                    |                    |                    |                |                   |                |                    |                    |                            |                        |                   |  |  |  |  |  |  |  |  |  |  |  |  |
| Structure (extent to which team is structured)                                   |                 |                   |                    |                |                   |                   |                         |                |                   |                   |                 |                   |                   |                      |                  |                 |                     |                   |                  |                            |                 |                        |                    |                  |                    |                    |                    |                 |                   |                |                      |                     |                    |               |                    |                    |                    |                |                   |                |                    |                    |                            |                        |                   |  |  |  |  |  |  |  |  |  |  |  |  |
| Organizational climate for teamwork                                              |                 |                   |                    |                |                   |                   |                         |                |                   |                   |                 |                   |                   |                      |                  |                 |                     |                   |                  |                            |                 |                        |                    |                  |                    |                    |                    |                 |                   |                |                      |                     |                    |               |                    |                    |                    |                |                   |                |                    |                    |                            |                        |                   |  |  |  |  |  |  |  |  |  |  |  |  |
| Perceived support for teamwork                                                   |                 |                   |                    |                |                   |                   |                         |                |                   |                   |                 |                   |                   |                      |                  |                 |                     |                   |                  |                            |                 |                        |                    |                  |                    |                    |                    |                 |                   |                |                      |                     |                    |               |                    |                    |                    |                |                   |                |                    |                    |                            |                        |                   |  |  |  |  |  |  |  |  |  |  |  |  |
| - external leadership (support from, style of)                                   |                 |                   |                    |                |                   |                   |                         |                |                   |                   |                 |                   |                   |                      |                  |                 |                     |                   |                  |                            |                 |                        |                    |                  |                    |                    |                    |                 |                   |                |                      |                     |                    |               |                    |                    |                    |                |                   |                |                    |                    |                            |                        |                   |  |  |  |  |  |  |  |  |  |  |  |  |
| - other organizational members                                                   |                 |                   |                    |                |                   |                   |                         |                |                   |                   |                 |                   |                   |                      |                  |                 |                     |                   |                  |                            |                 |                        |                    |                  |                    |                    |                    |                 |                   |                |                      |                     |                    |               |                    |                    |                    |                |                   |                |                    |                    |                            |                        |                   |  |  |  |  |  |  |  |  |  |  |  |  |
| Collaboration / learning                                                         |                 |                   |                    |                |                   |                   |                         |                |                   |                   |                 |                   |                   |                      |                  |                 |                     |                   |                  |                            |                 |                        |                    |                  |                    |                    |                    |                 |                   |                |                      |                     |                    |               |                    |                    |                    |                |                   |                |                    |                    |                            |                        |                   |  |  |  |  |  |  |  |  |  |  |  |  |
| Resources (including time, information, systems)                                 |                 |                   |                    |                |                   |                   |                         |                |                   |                   |                 |                   |                   |                      |                  |                 |                     |                   |                  |                            |                 |                        |                    |                  |                    |                    |                    |                 |                   |                |                      |                     |                    |               |                    |                    |                    |                |                   |                |                    |                    |                            |                        |                   |  |  |  |  |  |  |  |  |  |  |  |  |
| Rewards and recognition for teamwork                                             |                 |                   |                    |                |                   |                   |                         |                |                   |                   |                 |                   |                   |                      |                  |                 |                     |                   |                  |                            |                 |                        |                    |                  |                    |                    |                    |                 |                   |                |                      |                     |                    |               |                    |                    |                    |                |                   |                |                    |                    |                            |                        |                   |  |  |  |  |  |  |  |  |  |  |  |  |
| Training, education, external coaching                                           |                 |                   |                    |                |                   |                   |                         |                |                   |                   |                 |                   |                   |                      |                  |                 |                     |                   |                  |                            |                 |                        |                    |                  |                    |                    |                    |                 |                   |                |                      |                     |                    |               |                    |                    |                    |                |                   |                |                    |                    |                            |                        |                   |  |  |  |  |  |  |  |  |  |  |  |  |
| <b>ANTECEDENTS (individual level)</b>                                            |                 |                   |                    |                |                   |                   |                         |                |                   |                   |                 |                   |                   |                      |                  |                 |                     |                   |                  |                            |                 |                        |                    |                  |                    |                    |                    |                 |                   |                |                      |                     |                    |               |                    |                    |                    |                |                   |                |                    |                    |                            |                        |                   |  |  |  |  |  |  |  |  |  |  |  |  |
| Attitudes, beliefs, values about teamwork                                        |                 |                   |                    |                |                   |                   |                         |                |                   |                   |                 |                   |                   |                      |                  |                 |                     |                   |                  |                            |                 |                        |                    |                  |                    |                    |                    |                 |                   |                |                      |                     |                    |               |                    |                    |                    |                |                   |                |                    |                    |                            |                        |                   |  |  |  |  |  |  |  |  |  |  |  |  |
| Team orientation (collective v. individual orientation; preference for teamwork) |                 |                   |                    |                |                   |                   |                         |                |                   |                   |                 |                   |                   |                      |                  |                 |                     |                   |                  |                            |                 |                        |                    |                  |                    |                    |                    |                 |                   |                |                      |                     |                    |               |                    |                    |                    |                |                   |                |                    |                    |                            |                        |                   |  |  |  |  |  |  |  |  |  |  |  |  |
| Beliefs about specific teamwork processes                                        |                 |                   |                    |                |                   |                   |                         |                |                   |                   |                 |                   |                   |                      |                  |                 |                     |                   |                  |                            |                 |                        |                    |                  |                    |                    |                    |                 |                   |                |                      |                     |                    |               |                    |                    |                    |                |                   |                |                    |                    |                            |                        |                   |  |  |  |  |  |  |  |  |  |  |  |  |
| Belief about consequences & outcomes of teamwork                                 |                 |                   |                    |                |                   |                   |                         |                |                   |                   |                 |                   |                   |                      |                  |                 |                     |                   |                  |                            |                 |                        |                    |                  |                    |                    |                    |                 |                   |                |                      |                     |                    |               |                    |                    |                    |                |                   |                |                    |                    |                            |                        |                   |  |  |  |  |  |  |  |  |  |  |  |  |
| Beliefs about teamwork capability (self-efficacy)                                |                 |                   |                    |                |                   |                   |                         |                |                   |                   |                 |                   |                   |                      |                  |                 |                     |                   |                  |                            |                 |                        |                    |                  |                    |                    |                    |                 |                   |                |                      |                     |                    |               |                    |                    |                    |                |                   |                |                    |                    |                            |                        |                   |  |  |  |  |  |  |  |  |  |  |  |  |
| Commitment to specific team goals or project                                     |                 |                   |                    |                |                   |                   |                         |                |                   |                   |                 |                   |                   |                      |                  |                 |                     |                   |                  |                            |                 |                        |                    |                  |                    |                    |                    |                 |                   |                |                      |                     |                    |               |                    |                    |                    |                |                   |                |                    |                    |                            |                        |                   |  |  |  |  |  |  |  |  |  |  |  |  |

<sup>1</sup> 'a' and 'b' are used to label instruments when multiple instruments are reported in a single paper. <sup>2</sup> Shading denotes instruments excluded from Stage four (these instruments not in Table S6 or Additional File 7). <sup>3</sup> An 'X' may represent a single item, multiple items or an entire scale. <sup>4</sup> A '#' indicates a focal construct measured by the instrument. For these instruments, constructs marked with an X\* are measured in relation to the focal construct (#). For example, Baker 2010 is a measure of attitudes (the focal construct). It measures attitudes about team composition and leadership. <sup>5</sup> Few of the instruments had names assigned by their developers; therefore, we used the first authors' name and year of publication from the first of the main reports.

**Table S4a: Content of instruments measuring team process (healthcare settings) 1,2,3,4,5**

|                                                                         | Alemni 2001 [1] | Anderson 1998 [2] | Lukas 2009 [4] | Shortell 1991 [5] | Shortell 2004 [6] | Adler-Milstein 2011 [7] | Baker 2010 [8] | Caldwell 2003 [9] | Campion 1993 [10] | Costa 2011 [11] | Deeter-Schmelz 2003a [44] | Deeter-Schmelz 2003b [44] | Dobson 2009b [12] | Duckers 2008 [13] | Edmondson 1999a [14] | Edmondson 1999b [14] | Fulmer 2005 [15] | Irvine 2000a [18] | Irvine 2000b [18] | Irvine 2002 [19] | Lemieux-Charles 2002a [20] | Lewis 2003 [21] | Lichtenstein 1997 [22] | Lubomski 2008 [23] | Mills 2004 [24] | Millward 2001 [25] | Schouten 2010 [26] | Thompson 2009 [45] | Thylefors 2005 [27] | Vinokur-Kaplan 1995 [46] | Wilkins 2006 [47] |
|-------------------------------------------------------------------------|-----------------|-------------------|----------------|-------------------|-------------------|-------------------------|----------------|-------------------|-------------------|-----------------|---------------------------|---------------------------|-------------------|-------------------|----------------------|----------------------|------------------|-------------------|-------------------|------------------|----------------------------|-----------------|------------------------|--------------------|-----------------|--------------------|--------------------|--------------------|---------------------|--------------------------|-------------------|
|                                                                         | primary care    |                   |                |                   |                   | other health care       |                |                   |                   |                 |                           |                           |                   |                   |                      |                      |                  |                   |                   |                  |                            |                 |                        |                    |                 |                    |                    |                    |                     |                          |                   |
| <b>Regulation of team performance</b>                                   |                 |                   |                |                   |                   |                         |                |                   |                   |                 |                           |                           |                   |                   |                      |                      |                  |                   |                   |                  |                            |                 |                        |                    |                 |                    |                    |                    |                     |                          |                   |
| Goal specification and planning                                         |                 |                   |                |                   |                   |                         |                |                   |                   |                 |                           |                           |                   |                   |                      |                      |                  |                   |                   |                  |                            |                 |                        |                    |                 |                    |                    |                    |                     |                          |                   |
| - problem/task analysis                                                 | X               | X                 | X              |                   |                   |                         |                |                   |                   |                 | X                         |                           |                   |                   | X                    |                      |                  |                   |                   |                  | X                          |                 |                        |                    |                 |                    | X                  |                    |                     |                          |                   |
| - goal specification                                                    | X               |                   | X              | X                 |                   |                         |                |                   |                   |                 | X                         |                           |                   |                   |                      |                      |                  |                   |                   |                  | X                          |                 |                        |                    |                 |                    |                    | X                  |                     |                          |                   |
| - planning and strategy formulation                                     | X               |                   |                |                   | X                 | X                       |                |                   |                   |                 | X                         |                           |                   |                   |                      |                      | X*               |                   |                   | ?                |                            | X               |                        | X                  | X               | X                  |                    |                    |                     |                          |                   |
| Monitoring performance and adjustment                                   |                 |                   |                |                   |                   |                         |                |                   |                   |                 |                           |                           |                   |                   |                      |                      |                  |                   |                   |                  |                            |                 |                        |                    |                 |                    |                    |                    |                     |                          |                   |
| - monitoring progress toward goals (e.g., data collection, analysis)    | X               | X                 | X              | X                 | X                 | X                       |                |                   |                   |                 |                           |                           |                   |                   | X                    |                      |                  |                   |                   |                  |                            |                 |                        | X                  | X               | X                  |                    |                    |                     |                          |                   |
| - monitoring team processes                                             |                 | X                 |                |                   |                   | X                       |                |                   |                   |                 |                           |                           |                   |                   | X                    | X*                   |                  | X                 |                   |                  |                            |                 |                        |                    |                 |                    |                    |                    |                     |                          |                   |
| - feedback and reflection on performance                                |                 | X                 | X              | X                 | X                 | X                       | X              | X                 | X                 | X               |                           |                           |                   |                   | X                    | X*                   |                  | X                 |                   |                  |                            |                 |                        |                    |                 |                    | X                  | X                  |                     |                          | X                 |
| - seeking external ideas, feedback & support                            | X               |                   | X              |                   |                   | X*                      |                |                   |                   |                 |                           |                           |                   |                   | X                    |                      |                  |                   |                   |                  |                            |                 | X                      | X                  |                 | X                  |                    |                    |                     |                          |                   |
| - adaptation                                                            |                 | X                 | X              | X                 | X                 | X                       | X              | X                 | X                 | X*              |                           |                           |                   |                   | X                    | X*                   |                  |                   |                   |                  |                            |                 |                        |                    |                 | X                  | X                  |                    |                     |                          |                   |
| - backing up behaviors                                                  |                 | X                 |                |                   |                   | X*                      |                | X                 |                   |                 |                           |                           |                   |                   |                      |                      |                  |                   |                   |                  |                            |                 |                        |                    |                 |                    |                    |                    |                     |                          |                   |
| <b>Collaborative behaviors and interpersonal processes</b>              |                 |                   |                |                   |                   |                         |                |                   |                   |                 |                           |                           |                   |                   |                      |                      |                  |                   |                   |                  |                            |                 |                        |                    |                 |                    |                    |                    |                     |                          |                   |
| Communication                                                           |                 |                   | X              | X                 | X                 | X                       | X*             |                   | X                 |                 | X                         | X                         | X                 | X                 | X*                   |                      | X                |                   | X                 |                  | X                          |                 | X                      | X                  | X               | X                  |                    |                    |                     |                          |                   |
| - information exchange & knowledge sharing                              | X               | X                 | X              | X                 | X                 | X                       | X*             | X                 | X                 | X               | X                         | X*                        |                   |                   |                      |                      |                  |                   | X                 | X                | X                          |                 | X                      |                    | X               |                    |                    |                    | X                   | X                        |                   |
| Constructive controversy                                                | X               |                   | X              |                   |                   |                         |                |                   |                   |                 |                           |                           |                   |                   | X                    |                      |                  |                   |                   | X                |                            | X               |                        |                    |                 |                    | X                  |                    |                     | X                        |                   |
| Collaborative problem solving & decision making                         | X               | X                 | X              | X                 | X                 | X                       | X              | X                 | X                 | X               |                           |                           | X                 | X                 | X                    | X*                   |                  | X                 | X                 | X                | X                          |                 | X                      |                    | X               | X                  | X                  | X                  | X                   | X                        |                   |
| Participation, cooperation & workload sharing                           | X               | X                 | X              | X                 | X                 | X                       | X*             | X                 | X                 | X               |                           |                           | X                 |                   | X                    | X*                   | X                |                   | X                 | X                | X                          | X               | X                      | X                  | X               | X                  | X                  | X                  | X                   | X                        |                   |
| - making full use of members capabilities & perspectives                |                 | X                 |                | X                 | X                 |                         |                |                   |                   |                 |                           |                           | X                 |                   | X                    |                      |                  |                   |                   | X                |                            |                 |                        |                    | X               | X                  | X                  | X                  | X                   |                          |                   |
| - effort                                                                | X               |                   |                |                   | X                 |                         |                |                   |                   |                 |                           |                           |                   |                   |                      |                      |                  |                   |                   | X                |                            |                 |                        |                    |                 |                    | X                  | X                  | X                   |                          |                   |
| Coordination                                                            |                 |                   |                |                   |                   | X                       |                |                   |                   |                 |                           |                           |                   | X                 |                      |                      |                  |                   |                   |                  | X                          |                 |                        |                    |                 |                    |                    | X                  |                     |                          |                   |
| Conflict                                                                |                 | X                 |                |                   |                   | X*                      |                |                   |                   |                 |                           |                           |                   |                   |                      |                      |                  |                   |                   | X                | X                          | X               |                        |                    |                 |                    |                    |                    |                     |                          | #                 |
| <b>Team maintenance</b>                                                 |                 |                   |                |                   |                   |                         |                |                   |                   |                 |                           |                           |                   |                   |                      |                      |                  |                   |                   |                  |                            |                 |                        |                    |                 |                    |                    |                    |                     |                          |                   |
| Conflict management behaviors                                           |                 |                   | X              |                   |                   |                         | X              |                   |                   |                 |                           | X                         | X                 | X*                |                      |                      |                  |                   |                   |                  |                            |                 | X                      | X                  |                 | X                  |                    |                    |                     |                          |                   |
| Motivation and confidence building                                      |                 |                   |                |                   |                   |                         |                |                   |                   |                 |                           |                           |                   |                   |                      |                      |                  |                   |                   |                  |                            |                 |                        |                    |                 |                    | X                  |                    | X                   |                          |                   |
| Affect management                                                       |                 |                   |                |                   |                   |                         |                |                   |                   |                 |                           |                           |                   |                   |                      |                      |                  |                   |                   |                  |                            |                 |                        |                    |                 |                    |                    |                    |                     |                          |                   |
| Learning behaviors                                                      | X               |                   |                |                   |                   |                         |                |                   |                   | X               |                           |                           |                   |                   | #                    |                      |                  |                   |                   |                  |                            |                 |                        |                    |                 |                    | X                  |                    |                     |                          |                   |
| <b>Leadership behaviors (intra-team; designated or informal leader)</b> |                 |                   |                |                   |                   |                         |                |                   |                   |                 |                           |                           |                   |                   |                      |                      |                  |                   |                   |                  |                            |                 |                        |                    |                 |                    |                    |                    |                     |                          |                   |
| Coaching (for task performance or team process)                         |                 |                   |                |                   |                   |                         |                |                   |                   |                 |                           |                           |                   |                   |                      |                      |                  |                   |                   |                  | X                          |                 |                        |                    |                 |                    |                    | X                  |                     |                          |                   |
| Empowering                                                              |                 |                   | X              |                   |                   |                         |                |                   |                   |                 |                           |                           |                   |                   |                      |                      |                  |                   |                   | X                |                            |                 |                        |                    |                 |                    |                    |                    |                     |                          |                   |
| Shared & emergent leadership                                            |                 |                   |                |                   |                   |                         |                |                   |                   |                 |                           |                           |                   |                   |                      | X*                   |                  | X                 |                   |                  |                            |                 |                        |                    |                 | X                  | X                  |                    |                     |                          |                   |
| Leading by example (e.g., modeling, high self standards)                |                 |                   |                |                   |                   | X*                      |                |                   |                   |                 |                           |                           |                   |                   |                      |                      |                  |                   |                   |                  |                            |                 |                        |                    |                 |                    |                    |                    |                     |                          |                   |
| Other style or type (e.g., authentic, person or task centered)          |                 |                   | X              |                   |                   | X*                      |                |                   |                   |                 |                           |                           |                   |                   |                      |                      |                  |                   |                   |                  |                            |                 | X                      | X                  | X               |                    |                    |                    |                     |                          |                   |

1 'a' and 'b' are used to label instruments when multiple instruments are reported in a single paper.  
 2 Shading denotes instruments excluded from Stage four: review of measurement properties (hence, they do not appear in Table S6 or Additional File 7).  
 3 An 'X' may represent a single item, multiple items or an entire scale.  
 4 A # indicates that this is a focal construct measured by this instrument. For these instruments, constructs marked with an X\* are measured in relation to the focal construct (#). For example, Baker 2010 is a measure of attitudes (the focal construct). It measures attitudes about aspects of team process, but is not a measure of team process (i.e. it does not measure use of specific team process behaviors)  
 5 Few of the instruments had names assigned by their developers; therefore, we used the first authors' name and year of publication from the first of the main reports.

**Table S4b: Content of instruments measuring team process (non healthcare settings)** <sup>1,2,3,4</sup>

|                                                                         | Allen 1998 [28] | Arnold 2000 [48] | Barczak 2010 [29] | Brav 2009 [30] | Bunderson 2003 [49] | Bunderson 2010a [31] | Bunderson 2010b [31] | Coyle-Shapiro 2003 [50] | de Jong 2010a [51] | Driskell 2010 [33] | Eby 1997 [34] | Edmondson 1999c [14] | Hiller 2006 [52] | Hoegl 2001 [53] | Janssen 1999 [54] | Jehn 2008a [55] | Kuhn 2000 [56] | Manz 1987 [37] | Mathieu 2006 [38] | Savelsbergh 2009 [57] | Schippers 2007 [58] | Seers 1989 [59] | Staples 2008a [40] | Tjosvold 1986 [60] | Van den Bossche 2006b [41] | Wageman 2005 [43] |  |
|-------------------------------------------------------------------------|-----------------|------------------|-------------------|----------------|---------------------|----------------------|----------------------|-------------------------|--------------------|--------------------|---------------|----------------------|------------------|-----------------|-------------------|-----------------|----------------|----------------|-------------------|-----------------------|---------------------|-----------------|--------------------|--------------------|----------------------------|-------------------|--|
|                                                                         | non health care |                  |                   |                |                     |                      |                      |                         |                    |                    |               |                      |                  |                 |                   |                 |                |                |                   |                       |                     |                 |                    |                    |                            |                   |  |
| <b>Regulation of team performance</b>                                   |                 |                  |                   |                |                     |                      |                      |                         |                    |                    |               |                      |                  |                 |                   |                 |                |                |                   |                       |                     |                 |                    |                    |                            |                   |  |
| <b>Goal specification and planning</b>                                  |                 |                  |                   |                |                     |                      |                      |                         |                    |                    |               |                      |                  |                 |                   |                 |                |                |                   |                       |                     |                 |                    |                    |                            |                   |  |
| - problem/task analysis                                                 |                 |                  |                   |                |                     |                      |                      |                         |                    |                    |               |                      | X                |                 |                   |                 |                |                | X                 | X                     | X                   |                 |                    |                    | X                          |                   |  |
| - goal specification                                                    | X               |                  |                   |                | X                   |                      |                      |                         |                    |                    | X*            | X                    |                  |                 |                   |                 | X*             | X              | X                 |                       |                     |                 |                    |                    |                            |                   |  |
| - planning and strategy formulation                                     | X               |                  |                   |                | X                   |                      |                      |                         |                    | X*                 | X             |                      |                  |                 |                   |                 |                |                |                   | X                     | X                   |                 |                    |                    |                            |                   |  |
| <b>Monitoring performance and adjustment</b>                            |                 |                  |                   |                |                     |                      |                      |                         |                    |                    |               |                      |                  |                 |                   |                 |                |                |                   |                       |                     |                 |                    |                    |                            |                   |  |
| - monitoring progress toward goals (e.g., data collection, analysis)    | X               | X*               |                   |                |                     |                      |                      | X                       |                    |                    |               |                      |                  |                 |                   |                 |                | X*             | X                 | X                     |                     |                 |                    |                    |                            |                   |  |
| - monitoring team processes                                             |                 | X*               |                   |                |                     |                      |                      | X                       |                    |                    |               |                      |                  |                 |                   |                 |                | X*             | X                 | X                     |                     |                 |                    |                    |                            | X                 |  |
| - feedback and reflection on performance                                |                 | X*               | X                 |                |                     |                      |                      | X                       |                    |                    |               | X                    |                  |                 |                   |                 |                | X*             | X                 | #                     | X                   |                 |                    |                    |                            | X                 |  |
| - seeking external ideas, feedback & support                            | X               |                  | X                 |                |                     |                      |                      |                         |                    |                    |               |                      |                  |                 |                   |                 |                |                |                   | X                     |                     |                 |                    |                    |                            |                   |  |
| - adaptation                                                            | X               |                  |                   |                |                     |                      |                      | X                       |                    |                    |               |                      |                  |                 |                   |                 |                |                |                   | X                     | X                   |                 |                    |                    |                            |                   |  |
| - backing up behaviors                                                  |                 | X                |                   |                |                     |                      |                      | X                       |                    |                    |               | X                    | X                |                 |                   |                 |                |                |                   |                       |                     | X               |                    |                    |                            |                   |  |
| <b>Collaborative behaviors and interpersonal processes</b>              |                 |                  |                   |                |                     |                      |                      |                         |                    |                    |               |                      |                  |                 |                   |                 |                |                |                   |                       |                     |                 |                    |                    |                            |                   |  |
| <b>Communication</b>                                                    |                 |                  |                   |                |                     |                      |                      |                         |                    |                    |               |                      |                  |                 |                   |                 |                |                |                   |                       |                     |                 |                    |                    |                            |                   |  |
| - information exchange & knowledge sharing                              | X               | X*               | X                 |                |                     | #                    |                      |                         |                    |                    |               |                      | X                |                 |                   |                 |                | X              | X                 | X                     | X                   | X               | #                  | X                  | X                          | X                 |  |
| <b>Constructive controversy</b>                                         |                 |                  |                   |                |                     |                      |                      |                         |                    |                    |               |                      |                  |                 |                   |                 |                |                |                   |                       |                     |                 |                    |                    |                            |                   |  |
| Collaborative problem solving & decision making                         | X               | X*               | X                 |                |                     |                      |                      |                         | X*                 | X*                 |               | X                    | X                | X               |                   |                 | #              | X              | X                 | X                     | X                   | X               |                    |                    | X                          | X                 |  |
| Participation, cooperation & workload sharing                           | X               | X*               | X                 |                |                     | X                    | X                    | X                       |                    | X*                 | X             | X                    |                  |                 |                   |                 | X              |                |                   |                       |                     | X               |                    |                    | X                          | X                 |  |
| - making full use of members capabilities & perspectives                | X               |                  |                   |                |                     |                      |                      |                         |                    |                    |               |                      | X                |                 |                   |                 |                |                |                   | X                     |                     |                 |                    |                    |                            |                   |  |
| - effort                                                                |                 |                  |                   |                |                     | X                    | X                    | X                       |                    |                    |               |                      | X                |                 |                   |                 |                |                |                   |                       |                     |                 |                    |                    |                            | X                 |  |
| <b>Coordination</b>                                                     |                 |                  |                   |                |                     |                      |                      |                         |                    |                    |               |                      |                  |                 |                   |                 |                |                |                   |                       |                     |                 |                    |                    |                            |                   |  |
| Conflict                                                                |                 |                  |                   |                |                     |                      |                      |                         |                    | X*                 |               | X                    | X                |                 |                   |                 | #              |                |                   |                       |                     |                 |                    |                    |                            | X                 |  |
| <b>Team maintenance</b>                                                 |                 |                  |                   |                |                     |                      |                      |                         |                    |                    |               |                      |                  |                 |                   |                 |                |                |                   |                       |                     |                 |                    |                    |                            |                   |  |
| <b>Conflict management behaviors</b>                                    |                 |                  |                   |                |                     |                      |                      |                         |                    |                    |               |                      |                  |                 |                   |                 |                |                |                   |                       |                     |                 |                    |                    |                            |                   |  |
| Conflict management behaviors                                           | X               |                  |                   |                |                     |                      |                      |                         |                    | X*                 |               | X                    | X                | X               |                   |                 |                |                |                   |                       |                     |                 |                    |                    |                            | X                 |  |
| <b>Motivation and confidence building</b>                               |                 |                  |                   |                |                     |                      |                      |                         |                    |                    |               |                      |                  |                 |                   |                 |                |                |                   |                       |                     |                 |                    |                    |                            |                   |  |
| Motivation and confidence building                                      | X*              | X                |                   |                |                     | X                    |                      |                         |                    |                    |               | X                    | X                |                 |                   |                 |                | X*             | X                 |                       |                     |                 |                    |                    |                            | X                 |  |
| <b>Affect management</b>                                                |                 |                  |                   |                |                     |                      |                      |                         |                    |                    |               |                      |                  |                 |                   |                 |                |                |                   |                       |                     |                 |                    |                    |                            |                   |  |
| Affect management                                                       | X*              |                  |                   |                |                     |                      |                      |                         |                    |                    |               | X                    |                  |                 |                   |                 |                |                |                   |                       |                     |                 |                    |                    |                            |                   |  |
| <b>Learning behaviors</b>                                               |                 |                  |                   |                |                     |                      |                      |                         |                    |                    |               |                      |                  |                 |                   |                 |                |                |                   |                       |                     |                 |                    |                    |                            |                   |  |
| Learning behaviors                                                      |                 |                  |                   | X              |                     |                      |                      |                         |                    |                    |               |                      |                  |                 |                   |                 |                |                | X                 | #                     | X                   |                 |                    | X                  | #                          | X                 |  |
| <b>Leadership behaviors (intra-team; designated or informal leader)</b> |                 |                  |                   |                |                     |                      |                      |                         |                    |                    |               |                      |                  |                 |                   |                 |                |                |                   |                       |                     |                 |                    |                    |                            |                   |  |
| <b>Coaching (for task performance or team process)</b>                  |                 |                  |                   |                |                     |                      |                      |                         |                    |                    |               |                      |                  |                 |                   |                 |                |                |                   |                       |                     |                 |                    |                    |                            |                   |  |
| Coaching (for task performance or team process)                         | X               |                  |                   |                |                     |                      |                      |                         |                    |                    |               |                      | X                |                 |                   |                 |                |                |                   |                       |                     |                 |                    |                    |                            | X                 |  |
| <b>Empowering</b>                                                       |                 |                  |                   |                |                     |                      |                      |                         |                    |                    |               |                      |                  |                 |                   |                 |                |                |                   |                       |                     |                 |                    |                    |                            |                   |  |
| Empowering                                                              | #               |                  |                   |                |                     |                      |                      |                         |                    |                    |               |                      |                  |                 |                   |                 |                |                |                   |                       |                     |                 |                    |                    |                            | X                 |  |
| <b>Shared &amp; emergent leadership</b>                                 |                 |                  |                   |                |                     |                      |                      |                         |                    |                    |               |                      |                  |                 |                   |                 |                |                |                   |                       |                     |                 |                    |                    |                            |                   |  |
| Shared & emergent leadership                                            |                 |                  |                   |                |                     |                      |                      |                         |                    | X*                 |               | #                    |                  |                 |                   |                 |                |                |                   |                       |                     |                 |                    |                    |                            | X                 |  |
| <b>Leading by example (e.g., modeling, high self standards)</b>         |                 |                  |                   |                |                     |                      |                      |                         |                    |                    |               |                      |                  |                 |                   |                 |                |                |                   |                       |                     |                 |                    |                    |                            |                   |  |
| Leading by example (e.g., modeling, high self standards)                | X               |                  |                   |                |                     |                      |                      |                         |                    |                    |               |                      |                  |                 |                   |                 |                |                |                   |                       |                     |                 |                    |                    |                            |                   |  |
| <b>Other style or type (e.g., authentic, person or task centered)</b>   |                 |                  |                   |                |                     |                      |                      |                         |                    |                    |               |                      |                  |                 |                   |                 |                |                |                   |                       |                     |                 |                    |                    |                            |                   |  |
| Other style or type (e.g., authentic, person or task centered)          | X               |                  |                   |                |                     |                      |                      |                         |                    |                    |               |                      |                  |                 |                   |                 |                |                |                   |                       |                     |                 |                    |                    |                            |                   |  |

<sup>1</sup> 'a' and 'b' are used to label instruments when multiple instruments are reported from a single paper.

<sup>2</sup> Shading denotes instruments excluded from Stage four - review of measurement properties (hence, they do not appear in Table S6 or Additional File 7).

<sup>3</sup> An 'X' may represent a single item, multiple items or an entire scale.

<sup>4</sup> A # indicates that this is a focal construct measured by this instrument. For these instruments, constructs marked with an X\* are measured in relation to the focal construct (#). For example, Arnold 2000 is a measure of leadership behaviors (the focal construct). It measures leadership behaviors intended to support various team processes. It does not measure the team's use of these processes.

<sup>5</sup> Few of the instruments had names assigned by their developers; therefore, we used the first authors' name and year of publication from the first of the main reports.

**Table S5a: Content of instruments measuring proximal team outcomes (healthcare settings)**  
1,2,3,4,5

|                                                                                                      | Alemni 2001 [1] | Anderson 1998 [2] | Lukas 2009 [4] | Shortell 1991 [5] | Shortell 2004 [6] | West 2003 [61] | Adler-Milstein 2011 [7] | Caldwell 2003 [9] | Campion 1993 [10] | Costa 2011 [11] | Deeter-Schmelz 2003b [44] | Dobson 2009a [12] | Dobson 2009b [12] | Duckers 2008 [13] | Edmondson 1999b [14] | Irvine 2000a [18] | Irvine 2000b [18] | Irvine 2002 [19] | Lemieux-Charles 2002a [20] | Lemieux-Charles 2002b [20] | Lewis 2003 [21] | Lichtenstein 1997 [62] | Lichtenstein 2004 [63] | Lubomski 2008 [23] | Mills 2004 [24] | Millward 2001 [25] | Schouten 2010 [26] | Thompson 2009 [45] | Thylefors 2005 [64] | Tucker 2007 [65] | Vinokur-Kaplan 1995 [46] | Wilkins 2006 [47] |   |   |
|------------------------------------------------------------------------------------------------------|-----------------|-------------------|----------------|-------------------|-------------------|----------------|-------------------------|-------------------|-------------------|-----------------|---------------------------|-------------------|-------------------|-------------------|----------------------|-------------------|-------------------|------------------|----------------------------|----------------------------|-----------------|------------------------|------------------------|--------------------|-----------------|--------------------|--------------------|--------------------|---------------------|------------------|--------------------------|-------------------|---|---|
|                                                                                                      | primary care    |                   |                |                   |                   |                | other health care       |                   |                   |                 |                           |                   |                   |                   |                      |                   |                   |                  |                            |                            |                 |                        |                        |                    |                 |                    |                    |                    |                     |                  |                          |                   |   |   |
| <b>EMERGENT STATES (MEDIATORS)</b>                                                                   |                 |                   |                |                   |                   |                |                         |                   |                   |                 |                           |                   |                   |                   |                      |                   |                   |                  |                            |                            |                 |                        |                        |                    |                 |                    |                    |                    |                     |                  |                          |                   |   |   |
| Beliefs about team capability                                                                        |                 |                   |                |                   |                   |                |                         |                   |                   |                 |                           |                   |                   |                   |                      |                   |                   |                  |                            |                            |                 |                        |                        |                    |                 |                    |                    |                    |                     |                  |                          |                   |   |   |
| Efficacy                                                                                             |                 | X                 | #              |                   |                   |                |                         |                   |                   |                 |                           |                   |                   |                   |                      |                   |                   |                  |                            |                            |                 |                        |                        |                    |                 |                    |                    |                    |                     |                  |                          |                   |   |   |
| Potency                                                                                              |                 | X                 |                |                   |                   |                |                         |                   | X                 | X               |                           |                   |                   |                   | X                    |                   |                   |                  |                            |                            |                 |                        |                        |                    | X               | X                  |                    |                    |                     |                  |                          |                   |   |   |
| Knowledge (collective, shared)                                                                       |                 |                   |                |                   |                   |                |                         |                   |                   |                 |                           |                   |                   |                   |                      |                   |                   |                  |                            |                            |                 |                        |                        |                    |                 |                    |                    |                    |                     |                  |                          |                   |   |   |
| Mental models (shared understanding of team process, team task or both)                              |                 |                   |                |                   |                   |                |                         |                   |                   |                 |                           |                   |                   |                   |                      |                   |                   |                  |                            |                            |                 |                        |                        |                    |                 |                    |                    |                    |                     |                  |                          |                   |   |   |
| - goal clarity (shared understanding of goals)                                                       |                 | X                 |                | X                 |                   | X              |                         |                   |                   |                 |                           |                   | X                 |                   |                      |                   |                   |                  |                            |                            |                 |                        |                        |                    | X               | X                  | X                  | X                  |                     |                  |                          |                   |   |   |
| - role clarity (shared understanding of roles, including leadership roles)                           |                 |                   |                |                   |                   | #              |                         |                   |                   |                 |                           | X*                | X                 |                   |                      |                   |                   |                  |                            |                            | X               |                        |                        |                    |                 |                    | X                  | X                  |                     |                  |                          |                   |   |   |
| - task clarity (shared understanding of tasks & strategies)                                          |                 | X                 | X              |                   |                   | X              |                         |                   |                   |                 |                           |                   |                   |                   |                      |                   |                   |                  |                            |                            | X               |                        |                        |                    |                 |                    |                    |                    |                     |                  |                          |                   |   |   |
| Transactive memory systems (shared understanding of and ability to use member knowledge & expertise) |                 |                   |                |                   |                   |                |                         |                   |                   |                 |                           |                   |                   |                   |                      |                   |                   |                  |                            |                            | #               |                        |                        |                    |                 |                    | X                  |                    |                     |                  |                          |                   |   |   |
| Empowerment (perceptions of; psychological)                                                          |                 | X                 | X              |                   |                   |                |                         |                   |                   |                 |                           |                   |                   |                   |                      |                   |                   |                  |                            |                            |                 |                        | X                      |                    |                 |                    |                    |                    |                     |                  |                          |                   |   |   |
| Cohesion                                                                                             |                 |                   |                |                   |                   |                |                         |                   |                   |                 |                           |                   |                   |                   |                      |                   |                   |                  |                            |                            |                 |                        |                        |                    |                 |                    |                    |                    |                     |                  |                          |                   |   |   |
| - interpersonal/social cohesion                                                                      |                 | X                 | X              |                   |                   | X              | X                       |                   |                   |                 |                           | X                 |                   |                   |                      |                   |                   |                  |                            |                            |                 |                        |                        |                    | X               | X                  |                    |                    |                     |                  |                          |                   |   |   |
| - task cohesion (shared commitment to goal or task)                                                  |                 | X                 |                | X                 |                   | X              |                         |                   | X                 | X               |                           | X                 |                   |                   |                      |                   |                   |                  | X                          |                            |                 |                        |                        | X                  | X               | X                  | X                  | X                  |                     | X                |                          |                   |   |   |
| - group pride                                                                                        |                 |                   |                |                   |                   |                |                         |                   |                   |                 |                           |                   |                   |                   |                      |                   |                   |                  |                            |                            |                 |                        |                        |                    |                 | X                  |                    |                    |                     |                  |                          |                   |   |   |
| Trust (trustworthiness, propensity to trust)                                                         |                 | X                 | X              |                   |                   | X              |                         | #                 |                   |                 | X                         | X                 |                   |                   |                      |                   |                   |                  |                            |                            | X               |                        |                        |                    |                 |                    |                    |                    |                     |                  |                          |                   | X |   |
| Psychological safety (non-threatening & safe for risk taking)                                        |                 | X                 | X              |                   |                   | X              |                         |                   |                   |                 |                           |                   |                   |                   | #                    |                   |                   |                  |                            |                            | X               |                        |                        | X                  |                 |                    |                    |                    |                     |                  |                          |                   | # |   |
| Team identification (affiliation with a specific team; individual commitment to the team)            |                 |                   |                |                   |                   |                |                         |                   |                   | X               | X                         | X                 |                   |                   |                      | #                 |                   |                  |                            |                            |                 |                        |                        | X                  |                 | X                  |                    |                    |                     |                  |                          |                   |   |   |
| Team climate (intra-team)                                                                            |                 | #                 |                |                   |                   |                |                         |                   |                   | X               |                           |                   |                   |                   |                      |                   |                   |                  |                            |                            |                 |                        |                        |                    |                 |                    |                    |                    |                     |                  |                          |                   |   |   |
| Focus on innovation and improvement                                                                  |                 | X                 |                |                   |                   |                | #                       |                   |                   |                 |                           |                   |                   |                   |                      |                   |                   |                  |                            |                            |                 |                        |                        |                    |                 |                    | X                  |                    |                     |                  |                          |                   | X |   |
| Quality orientation                                                                                  |                 | X                 | X              |                   |                   |                |                         |                   |                   |                 |                           |                   |                   |                   |                      |                   |                   |                  | X                          |                            |                 |                        |                        |                    |                 |                    |                    |                    |                     |                  |                          |                   |   |   |
| Learning orientation (learning v. performance focus)                                                 |                 |                   |                |                   |                   |                | X                       |                   |                   |                 |                           |                   |                   |                   |                      |                   |                   |                  |                            |                            |                 |                        |                        |                    |                 |                    |                    |                    |                     |                  |                          |                   |   | # |
| Valuing differences, respect, openness                                                               |                 | X                 | X              |                   |                   | X              | X                       | X                 |                   | X               |                           | X                 | X                 |                   | X                    |                   |                   |                  | X                          |                            |                 |                        |                        | X                  | X               | X                  | X                  | X                  |                     | X                |                          |                   |   | X |
| Team norms (behavioral expectations)                                                                 |                 | X                 |                |                   |                   | X              | X                       | X                 | #                 |                 |                           |                   |                   | X                 |                      |                   |                   | X                | X                          |                            | X               |                        |                        | X                  | X               |                    |                    | X                  |                     |                  |                          |                   | X |   |
| <b>PERCEIVED TEAM EFFECTIVENESS</b>                                                                  |                 |                   |                |                   |                   |                |                         |                   |                   |                 |                           |                   |                   |                   |                      |                   |                   |                  |                            |                            |                 |                        |                        |                    |                 |                    |                    |                    |                     |                  |                          |                   |   |   |
| Task performance outcomes                                                                            |                 |                   |                |                   |                   |                |                         |                   |                   |                 |                           |                   |                   |                   |                      |                   |                   |                  |                            |                            |                 |                        |                        |                    |                 |                    |                    |                    |                     |                  |                          |                   |   |   |
| Perceived task performance                                                                           |                 |                   |                |                   |                   |                |                         |                   |                   |                 |                           |                   |                   |                   |                      |                   |                   |                  |                            |                            |                 |                        |                        |                    |                 |                    |                    |                    |                     |                  |                          |                   |   |   |
| - team member perception (e.g., perceived impact)                                                    | X               |                   | X              |                   |                   |                |                         |                   |                   |                 |                           | X                 |                   |                   | #                    |                   | X                 | X                |                            |                            | X               | X                      |                        | X                  | X               |                    |                    |                    |                     | X                |                          |                   |   |   |
| - external perception (manager, consumer etc)                                                        |                 |                   |                |                   |                   |                |                         |                   |                   |                 |                           |                   |                   |                   |                      |                   |                   |                  |                            |                            |                 |                        |                        |                    |                 |                    |                    |                    |                     |                  |                          |                   |   |   |
| Attitudinal outcomes                                                                                 |                 |                   |                |                   |                   |                |                         |                   |                   |                 |                           |                   |                   |                   |                      |                   |                   |                  |                            |                            |                 |                        |                        |                    |                 |                    |                    |                    |                     |                  |                          |                   |   |   |
| Team viability (willingness to continue with team)                                                   |                 |                   |                |                   |                   |                |                         |                   |                   |                 |                           |                   |                   |                   |                      |                   |                   |                  |                            |                            |                 |                        |                        |                    |                 |                    |                    |                    |                     |                  |                          |                   |   |   |
| Satisfaction with team (task performance, team process)                                              |                 |                   |                |                   |                   |                |                         |                   |                   |                 |                           |                   |                   |                   |                      |                   |                   |                  | X                          | X                          |                 | X                      |                        |                    |                 |                    |                    |                    |                     |                  |                          |                   | X |   |
| Ongoing commitment to team                                                                           |                 |                   |                |                   |                   |                |                         |                   |                   |                 |                           |                   |                   |                   |                      |                   |                   |                  |                            | X                          |                 |                        |                        |                    |                 |                    |                    |                    |                     |                  |                          |                   |   |   |
| Behavioral outcomes (team functioning)                                                               |                 |                   |                |                   |                   |                |                         |                   |                   |                 |                           |                   |                   |                   |                      |                   |                   |                  |                            |                            | X               | X                      |                        | X                  | X               | X                  |                    |                    |                     |                  |                          |                   |   |   |

<sup>1</sup> 'a' and 'b' are used to label instruments when multiple instruments are reported from a single paper.

<sup>2</sup> Shading denotes instruments excluded from Stage four - review of measurement properties (hence, they do not appear in Table S6 or Additional File 7).

<sup>3</sup> An 'X' may represent a single item, multiple items or an entire scale.

<sup>4</sup> A # indicates that this is a focal construct measured by this instrument. For these instruments, constructs marked with an X\* in this or other tables are measured in relation to the focal construct (#).

<sup>5</sup> Few of the instruments had names assigned by their developers; therefore, we used the first authors' name and year of publication from the first of the main reports.

**Table S5b: Content of instruments measuring proximal team outcomes (non healthcare settings)**  
1,2,3,4,5

|                                                                                                      | Allen 1998 [28] | Arnold 2000 [48] | Barczak 2010 [29] | Bishop 2005 [66] | Brav 2009 [30] | Bunderson 2003 [49] | Bunderson 2010a [31] | Carlless 2000a [67] | Coyle-Shapiro 2003 [50] | de Jong 2010b [51] | Edmondson 1999c [14] | Guzzo 1993 [68] | Hoegl 2001 [53] | Janssen 1999 [54] | Janssen 2008 [69] | Jehn 2008a [55] | Jehn 2008b [55] | Jehn 2008c [55] | Kirkman 1999a [35] | Kuhn 2000 [56] | Mathieu 2006 [38] | Savelbergh 2009 [57] | Seers 1989 [59] | Staples 2008b [40] | Tjosvold 1986 [60] | Van den Bossche 2006a [41] | Wageman 2005 [43] |   |
|------------------------------------------------------------------------------------------------------|-----------------|------------------|-------------------|------------------|----------------|---------------------|----------------------|---------------------|-------------------------|--------------------|----------------------|-----------------|-----------------|-------------------|-------------------|-----------------|-----------------|-----------------|--------------------|----------------|-------------------|----------------------|-----------------|--------------------|--------------------|----------------------------|-------------------|---|
|                                                                                                      | non health care |                  |                   |                  |                |                     |                      |                     |                         |                    |                      |                 |                 |                   |                   |                 |                 |                 |                    |                |                   |                      |                 |                    |                    |                            |                   |   |
| <b>EMERGENT STATES (MEDIATORS)</b>                                                                   |                 |                  |                   |                  |                |                     |                      |                     |                         |                    |                      |                 |                 |                   |                   |                 |                 |                 |                    |                |                   |                      |                 |                    |                    |                            |                   |   |
| Beliefs about team capability                                                                        |                 |                  |                   |                  |                |                     |                      |                     |                         |                    |                      |                 |                 |                   |                   |                 |                 |                 |                    |                |                   |                      |                 |                    |                    |                            |                   |   |
| Efficacy                                                                                             |                 |                  |                   |                  |                |                     |                      |                     |                         |                    |                      |                 |                 |                   |                   |                 | X               |                 |                    |                |                   |                      |                 |                    |                    |                            |                   |   |
| Potency                                                                                              |                 |                  |                   |                  |                |                     |                      | X                   |                         | #                  |                      |                 |                 |                   |                   |                 |                 |                 | X                  |                |                   |                      |                 |                    |                    | #                          | X                 |   |
| Knowledge (collective, shared)                                                                       |                 |                  |                   |                  |                |                     |                      |                     |                         |                    |                      |                 |                 |                   |                   |                 |                 |                 |                    |                |                   |                      |                 |                    |                    |                            |                   |   |
| Mental models (shared understanding of team process, team task or both)                              | X               |                  |                   |                  |                |                     |                      |                     |                         |                    |                      |                 |                 |                   |                   |                 |                 |                 |                    |                |                   |                      |                 |                    |                    |                            |                   |   |
| - goal clarity (shared understanding of goals)                                                       | X               |                  |                   |                  |                | X                   |                      |                     |                         | X                  |                      | X               |                 |                   |                   |                 |                 |                 |                    |                |                   |                      |                 |                    |                    |                            |                   | X |
| - role clarity (shared understanding of roles, including leadership roles)                           | X               |                  |                   |                  |                | X                   |                      |                     |                         |                    |                      |                 |                 |                   |                   |                 |                 |                 |                    |                |                   |                      |                 |                    |                    |                            |                   |   |
| - task clarity (shared understanding of tasks & strategies)                                          | X               |                  |                   |                  |                |                     |                      |                     |                         |                    |                      |                 |                 |                   |                   |                 |                 |                 |                    |                |                   |                      | X               |                    |                    |                            |                   |   |
| Transactive memory systems (shared understanding of and ability to use member knowledge & expertise) |                 |                  |                   |                  |                |                     |                      |                     |                         |                    |                      |                 |                 |                   |                   |                 |                 |                 |                    |                |                   |                      |                 |                    |                    |                            |                   |   |
| Empowerment (perceptions of; psychological)                                                          |                 |                  |                   |                  |                |                     |                      |                     |                         |                    |                      |                 |                 |                   |                   |                 |                 |                 |                    | #              |                   |                      |                 |                    |                    |                            |                   |   |
| Cohesion                                                                                             |                 |                  |                   |                  |                |                     |                      |                     |                         |                    |                      |                 |                 |                   |                   |                 |                 |                 |                    |                |                   |                      |                 |                    |                    |                            |                   |   |
| - interpersonal/social cohesion                                                                      |                 |                  | X                 |                  |                |                     | #                    | X                   |                         |                    |                      | X               |                 |                   |                   | X               |                 |                 |                    |                |                   |                      |                 |                    |                    | #                          | X                 |   |
| - task cohesion (shared commitment to goal or task)                                                  |                 |                  |                   |                  |                |                     | #                    | X                   |                         |                    |                      | X               |                 |                   |                   |                 |                 |                 |                    |                |                   |                      |                 |                    | X                  | #                          |                   |   |
| - group pride                                                                                        |                 |                  |                   | X                |                |                     |                      | X                   |                         |                    |                      | X               |                 |                   |                   |                 |                 |                 |                    |                |                   |                      |                 |                    |                    |                            |                   | X |
| Trust (trustworthiness, propensity to trust)                                                         |                 |                  | #                 |                  |                |                     |                      | #                   | #                       |                    |                      |                 |                 |                   |                   | X               |                 |                 |                    | X              |                   |                      | #               |                    |                    | X                          |                   |   |
| Psychological safety (non-threatening & safe for risk taking)                                        |                 | X                |                   | X                |                |                     |                      |                     |                         |                    |                      |                 |                 |                   |                   |                 |                 |                 |                    |                |                   | X                    |                 |                    | X                  | #                          |                   |   |
| Team identification (affiliation with a specific team; individual commitment to the team)            | X               |                  | #                 |                  |                |                     |                      |                     |                         |                    |                      |                 |                 |                   | #                 |                 |                 |                 |                    |                |                   |                      |                 |                    |                    |                            | X                 |   |
| Team climate (intra-team)                                                                            |                 |                  |                   |                  |                |                     |                      |                     |                         |                    |                      |                 |                 |                   |                   |                 |                 |                 |                    |                |                   |                      |                 |                    |                    |                            |                   |   |
| Focus on innovation and improvement                                                                  |                 |                  | #                 |                  | X              |                     |                      |                     |                         |                    |                      |                 |                 |                   |                   |                 |                 |                 |                    |                |                   | X                    |                 |                    |                    |                            |                   | X |
| Quality orientation                                                                                  | X               | X*               | X                 |                  |                |                     |                      |                     |                         |                    |                      |                 |                 |                   |                   |                 |                 |                 |                    |                |                   | X                    |                 |                    |                    |                            |                   |   |
| Learning orientation (learning v. performance focus)                                                 |                 |                  |                   |                  |                |                     | #                    |                     |                         |                    |                      |                 |                 |                   |                   |                 |                 |                 |                    |                |                   |                      |                 |                    |                    |                            |                   |   |
| Valuing differences, respect, openness                                                               |                 |                  | X                 |                  |                |                     |                      |                     |                         |                    |                      |                 |                 |                   |                   | X               |                 |                 |                    |                | X                 | X                    |                 |                    | X                  | X                          |                   |   |
| Team norms (behavioral expectations)                                                                 | X               |                  |                   |                  |                |                     |                      |                     | X                       |                    |                      |                 |                 |                   | X                 |                 |                 |                 |                    |                | X                 | X                    |                 |                    | X                  | X                          |                   |   |
| <b>PERCEIVED TEAM EFFECTIVENESS</b>                                                                  |                 |                  |                   |                  |                |                     |                      |                     |                         |                    |                      |                 |                 |                   |                   |                 |                 |                 |                    |                |                   |                      |                 |                    |                    |                            |                   |   |
| Task performance outcomes                                                                            |                 |                  |                   |                  |                |                     |                      |                     |                         |                    |                      |                 |                 |                   |                   |                 |                 |                 |                    |                |                   |                      |                 |                    |                    |                            |                   |   |
| Perceived task performance                                                                           |                 |                  |                   |                  |                |                     |                      |                     |                         |                    |                      |                 |                 |                   |                   |                 |                 |                 |                    |                |                   |                      |                 |                    |                    |                            |                   |   |
| - team member perception (e.g., perceived impact)                                                    | X               |                  |                   |                  |                |                     |                      |                     |                         |                    |                      |                 |                 |                   |                   |                 |                 |                 | X                  |                |                   |                      |                 |                    |                    |                            | X                 |   |
| - external perception (manager, consumer etc)                                                        |                 |                  |                   |                  |                |                     |                      |                     |                         |                    |                      |                 |                 |                   |                   |                 |                 |                 |                    |                |                   |                      |                 |                    |                    |                            |                   |   |
| Attitudinal outcomes                                                                                 |                 |                  |                   |                  |                |                     |                      |                     |                         |                    |                      |                 |                 |                   |                   |                 |                 |                 |                    |                |                   |                      |                 |                    |                    |                            |                   |   |
| Team viability (willingness to continue with team)                                                   |                 |                  |                   |                  |                |                     |                      |                     |                         |                    |                      |                 |                 |                   |                   |                 |                 |                 | #                  |                |                   |                      |                 |                    |                    |                            | X                 |   |
| Satisfaction with team (task performance, team process)                                              | X               |                  |                   |                  |                |                     |                      |                     |                         |                    |                      |                 | X               | #                 | X                 |                 | X               |                 | X                  |                | X                 |                      |                 |                    |                    |                            | X                 |   |
| Ongoing commitment to team                                                                           |                 |                  |                   |                  |                |                     |                      |                     |                         |                    |                      |                 |                 |                   | X                 |                 |                 |                 |                    |                |                   |                      |                 |                    |                    |                            |                   |   |
| Behavioral outcomes (team functioning)                                                               |                 |                  |                   |                  |                |                     |                      |                     |                         |                    |                      |                 |                 |                   |                   |                 |                 |                 |                    |                |                   |                      |                 |                    |                    |                            |                   |   |

<sup>1</sup> 'a' and 'b' are used to label instruments when multiple instruments are reported from a single paper.

<sup>2</sup> Shading denotes instruments excluded from Stage four - review of measurement properties (hence, they do not appear in Table S6 or Additional File 7).

<sup>3</sup> An 'X' may represent a single item, multiple items or an entire scale.

<sup>4</sup> A # indicates that this is a focal construct measured by this instrument. For these instruments, constructs marked with an X\* are measured in relation to the focal construct (#). For example, Arnold 2000 is a measure of leadership behaviors (the focal construct). It measures leadership behaviors that emphasize quality (quality orientation). It does not measure whether the team has a quality orientation.

<sup>5</sup> Few of the instruments had names assigned by their developers; therefore, we used the first authors' name and year of publication from the first of the main reports.



## References

1. Alemi F, Safaie FK, Neuhauser D: **A survey of 92 quality improvement projects.** *Jt Comm J Qual Improv* 2001, **27**:619-632.
2. Anderson N, West M: **Measuring climate for work group innovation: Development and validation of the Team Climate Inventory.** *J Organ Behav* 1998, **19**:235-258.
3. Hearnshaw H, Reddish S, Carlyle D, Baker R, Robertson N: **Introducing a quality improvement programme to primary healthcare teams.** *Qual Health Care* 1998, **7**:200-208.
4. Lukas CV, Mohr DC, Meterko M: **Team effectiveness and organizational context in the implementation of a clinical innovation.** *Qual Manag Health Care* 2009, **18**:25-39.
5. Shortell SM, Rousseau DM, Gillies RR, Devers KJ, Simons TL: **Organizational assessment in intensive care units (ICUs): construct development, reliability, and validity of the ICU nurse-physician questionnaire.** *Med Care* 1991, **29**:709-726.
6. Shortell SM, Marsteller JA, Lin M, Pearson ML, Wu SY, Mendel P, Cretin S, Rosen M: **The role of perceived team effectiveness in improving chronic illness care.** *Med Care* 2004, **42**:1040-1048.
7. Adler-Milstein J, Neal K, Howell MD: **Residents' and nurses' perceptions of team function in the medical intensive care unit.** *J Crit Care* 2011, **26**:104.e107-115.
8. Baker DP, Amodeo AM, Krokos KJ, Slonim A, Herrera H: **Assessing teamwork attitudes in healthcare: development of the TeamSTEPPS teamwork attitudes questionnaire.** *Qual Saf Health Care* 2010, **19**:e49.
9. Caldwell DF, O'Reilly CA, III: **The determinants of team-based innovation in organizations. The role of social influence.** *Small Gr Res* 2003, **34**:497-517.
10. Champion MA, Medsker GJ, Higgs AC: **Relations between work group characteristics and effectiveness: Implications for designing effective work groups.** *Pers Psychol* 1993, **46**:823-850.
11. Costa AC, Anderson N: **Measuring trust in teams: Development and validation of a multifaceted measure of formative and reflective indicators of team trust.** *Eur J Work Org Psychol* 2011, **20**:119-154.
12. Dobson RT, Stevenson K, Busch A, Scott DJ, Henry C, Wall PA: **A quality improvement activity to promote interprofessional collaboration among health professions students.** *Am J Pharm Educ* 2009, **73**:64.
13. Duckers MLA, Wagner C, Groenewegen PP: **Developing and testing an instrument to measure the presence of conditions for successful implementation of quality improvement collaboratives.** *BMC Health Serv Res* 2008, **8**:172.

14. Edmondson A: **Psychological safety and learning behavior in work teams.** *Adm Sci Q* 1999, **44**:350-383.
15. Fulmer T, Hyer K, Flaherty E, Mezey M, Whitelaw N, Jacobs MO, Luchi R, Hansen JC, Evans DA, Cassel C, et al: **Geriatric interdisciplinary team training program: evaluation results.** *J Aging Health* 2005, **17**:443-470.
16. Gould BE, Grey MR, Huntington CG, Gruman C, Rosen JH, Storey E, Abrahamson L, Conaty AM, Curry L, Ferreira M, et al: **Improving patient care outcomes by teaching quality improvement to medical students in community-based practices.** *Acad Med* 2002, **77**:1011-1018.
17. Heinemann G, Schmitt MH, Farrell M, Brallier S: **Development of an attitudes toward health care teams scale.** *Eval Health Prof* 1999, **22**:123-142.
18. Irvine DM, Leatt P, Evans MG, Baker GR: **The behavioural outcomes of quality improvement teams: the role of team success and team identification.** *Health Serv Manage Res* 2000, **13**:78-89.
19. Irvine Doran DM, Baker GR, Murray M, Bohnen J, Zahn C, Sidani S, Carryer J: **Achieving clinical improvement: an interdisciplinary intervention.** *Health Care Manage Rev* 2002, **27**:42-56.
20. Lemieux-Charles L, Murray M, Baker G, Barnsley J, Tasa K, Ibrahim S: **The effects of quality improvement practices on team effectiveness: a mediational model.** *J Organ Behav* 2002, **23**:533-553.
21. Lewis K: **Measuring transactive memory systems in the field: Scale development and validation.** *J Appl Psychol* 2003, **88**:587-604.
22. Lichtenstein R, Alexander JA, Jinnett K, Ullman E: **Embedded intergroup relations in interdisciplinary teams: Effects on perceptions of level of team integration.** *J Appl Behav Sci* 1997, **33**:413-434.
23. Lubomski LH, Marsteller JA, Hsu YJ, Goeschel CA, Holzmueller CG, Pronovost PJ: **The team checklist tool: evaluating QI team activities and giving feedback to senior leaders.** *Jt Comm J Qual Patient Saf* 2008, **34**:619-623, 561.
24. Mills PD, Weeks WB: **Characteristics of successful quality improvement teams: lessons from five collaborative projects in the VHA.** *Jt Comm J Qual Saf* 2004, **30**:152-162.
25. Millward LJ, Jeffries N: **The team survey: a tool for health care team development.** *J Adv Nurs* 2001, **35**:276-287.
26. Schouten L, Grol R, Hulscher M: **Factors influencing success in quality improvement collaboratives: development and psychometric testing of an instrument.** *Implement Sci* 2010, **5**:84.



27. Thylefors I, Persson O, Hellstrom D: **Team types, perceived efficiency and team climate in Swedish cross-professional teamwork.** *J Interprof Care* 2005, **19**:102-114.
28. Allen JM, Schumacker RE: **Team assessment utilizing a many-facet Rasch model.** *J Outcome Meas* 1998, **2**:142-158.
29. Barczak G, Lassk F, Mulki J: **Antecedents of team creativity: An examination of team emotional intelligence, team trust and collaborative culture.** *Creat Innov Man* 2010, **19**:332-345.
30. Brav A, Andersson K, Lantz A: **Group initiative and self-organizational activities in industrial work groups.** *Eur J Work Org Psychol* 2009, **18**:347-377.
31. Bunderson J, Boumgarden P: **Structure and learning in self-managed teams: Why "bureaucratic" teams can be better learners.** *Organ Sci* 2010, **21**:609-624.
32. Carless SA, Wearing AJ, Mann L: **A short measure of transformational leadership.** *J Bus Psychol* 2000, **14**:389-405.
33. Driskell JE, Salas E, Hughes S: **Collective orientation and team performance: development of an individual differences measure.** *Hum Factors* 2010, **52**:316-328.
34. Eby LT, Dobbins GH: **Collectivistic orientation in teams: An individual and group-level analysis.** *J Organ Behav* 1997, **18**:275-295.
35. Kirkman BL, Rosen B: **Beyond self-management: antecedents and consequences of team empowerment.** *Acad Manage J* 1999, **42**:58-74.
36. Langfred CW: **Autonomy and performance in teams: the multilevel moderating effect of task interdependence.** *J Manage* 2005, **31**:513-529.
37. Manz CC, Sims HP: **Leading workers to lead themselves: The external leadership of self-managing work teams.** *Adm Sci Q* 1987, **32**:106-129.
38. Mathieu JE, Gilson LL, Ruddy TM: **Empowerment and team effectiveness: an empirical test of an integrated model.** *J Appl Psychol* 2006, **91**:97-108.
39. Shaw JD, Duffy MK, Stark EM: **Interdependence and preference for group work: Main and congruence effects on the satisfaction and performance of group members.** *J Manage* 2000, **26**:259-279.
40. Staples D, Webster J: **Exploring the effects of trust, task interdependence and virtualness on knowledge sharing in teams.** *Inform Syst J* 2008, **18**:617-640.
41. van den Bossche P, Gijsselaers WH, Segers M, Kirschner PA: **Social and Cognitive Factors Driving Teamwork in Collaborative Learning Environments: Team Learning Beliefs and Behaviors.** *Small Gr Res* 2006, **37**:490-521.

42. van der Vegt G, Emans B, van de Vliert E: **Motivating effects of task and outcome interdependence in work teams.** *Group Organ Manage* 1998, **23**:124-143.
43. Wageman R, Hackman J, Lehman E: **Team Diagnostic Survey: Development of an Instrument.** *J Appl Behav Sci* 2005, **41**:373-398.
44. Deeter-Schmelz DR, Ramsey RP: **An investigation of team information processing in service teams: exploring the link between teams and customers.** *J Acad Market Sci* 2003, **31**:409-424.
45. Thompson BM, Levine RE, Kennedy F, Naik AD, Foldes CA, Coverdale JH, Kelly PA, Parmelee D, Richards BF, Haidet P: **Evaluating the quality of learning-team processes in medical education: development and validation of a new measure.** *Acad Med* 2009, **84**:S124-127.
46. Vinokur-Kaplan D: **Treatment teams that work (and those that don't): An application of Hackman's group effectiveness model to interdisciplinary teams in psychiatric hospitals.** *J Appl Behav Sci* 1995, **31**:303-327.
47. Wilkens R, London M: **Relationships between climate, process, and performance in continuous quality improvement groups.** *J Vocat Behav* 2006, **69**:510-523.
48. Arnold JA, Arad S, Rhoades JA, Drasgow F: **The Empowering Leadership Questionnaire: the construction and validation of a new scale for measuring leader behaviors.** *J Organ Behav* 2000, **21**:249-269.
49. Bunderson JS, Sutcliffe KM: **Management team learning orientation and business unit performance.** *J Appl Psychol* 2003, **88**:552-560.
50. Coyle-Shapiro JAM, Morrow PC: **The role of individual differences in employee adoption of TQM orientation.** *J Vocat Behav* 2003, **62**:320-340.
51. de Jong B, Elfring T: **How does trust affect the performance of ongoing teams? The mediating role of reflexivity, monitoring, and effort.** *Acad Manage J* 2010, **53**:535-549.
52. Hiller NJ, Day DV, Vance RJ: **Collective enactment of leadership roles and team effectiveness: A field study.** *Leadership Quart* 2006, **17**:387-397.
53. Hoegl M, Gemuenden HG: **Teamwork quality and the success of innovative projects: A theoretical concept and empirical evidence.** *Organ Sci* 2001, **12**:435-449.
54. Janssen O, Van de Vliert E, Veenstra C: **How task and person conflict shape the role of positive interdependence in management teams.** *J Manage* 1999, **25**:117-142.
55. Jehn KA, Greer L, Levine S, Szulanski G: **The effects of conflict types, dimensions, and emergent states on group outcomes.** *Group Decis Negot* 2008, **17**:465-495.
56. Kuhn T, Poole MS: **Do conflict management styles affect group decision making? Evidence from a longitudinal field study.** *Hum Commun Res* 2000, **26**:558-590.

57. Savelsbergh CM, van der Heijden BI, Poell RF: **The development and empirical validation of a multidimensional measurement instrument for team learning behaviors.** *Small Gr Res* 2009, **40**:578-607.
58. Schippers MC, Den Hartog DN, Koopman PL: **Reflexivity in teams: A measure and correlates.** *Appl Psychol Int Rev* 2007, **56**:189-211.
59. Seers A: **Team-member exchange quality: A new construct for role-making research.** *Organ Behav Hum Decis Process* 1989, **43**:118-135.
60. Tjosvold D, Wedley WC, Field RH: **Constructive controversy, the Vroom-Yetton model, and managerial decision-making.** *J Occup Behav* 1986, **7**:125-138.
61. West MA, Borrill CS, Dawson JF, Brodbeck F, Shapiro DA, Haward B: **Leadership clarity and team innovation in health care.** *Leadership Quart* 2003, **14**:393-410.
62. Lichtenstein R, Alexander J, Jinnett A, Ullman E: **Embedded intergroup relations in interdisciplinary teams: Effects on perceptions of level of team integration.** *J Appl Behav Sci* 1997, **33**:413-434.
63. Lichtenstein R, Alexander JA, McCarthy JF, Wells R: **Status differences in cross-functional teams: effects on individual member participation, job satisfaction, and intent to quit.** *J Health Soc Behav* 2004, **45**:322-335.
64. Thylefors I, Persson O, Hellstrom D: **Team types, perceived efficiency and team climate in Swedish cross-professional teamwork.** *J Interprof Care* 2005, **19**:102-114.
65. Tucker AL, Nembhard IM, Edmondson AC: **Implementing New Practices: An Empirical Study of Organizational Learning in Hospital Intensive Care Units.** *Manage Sci* 2007, **53**:894-907.
66. Bishop JW, Scott K, Goldsby MG, Cropanzano R: **A construct validity study of commitment and perceived support variables: A multifoci approach across different team environments.** *Group Organ Manage* 2005, **30**:153-180.
67. Carless SA, De Paola C: **The measurement of cohesion in work teams.** *Small Gr Res* 2000, **31**:71-88.
68. Guzzo RA, Yost PR, Campbell RJ, Shea GP: **Potency in groups: Articulating a construct.** *Br J Soc Psychol* 1993, **32**:87-106.
69. Janssen O, Huang X: **Us and me: Team identification and individual differentiation as complementary drivers of team members' citizenship and creative behaviors.** *J Manage* 2008, **34**:69-88.
